# Supplementary material for: Non-invasive optical spectroscopic monitoring of breast development during puberty
Source: Springer Nature journal article supplement (doi:10.1186/s13058-017-0805-x), 2017-02-06

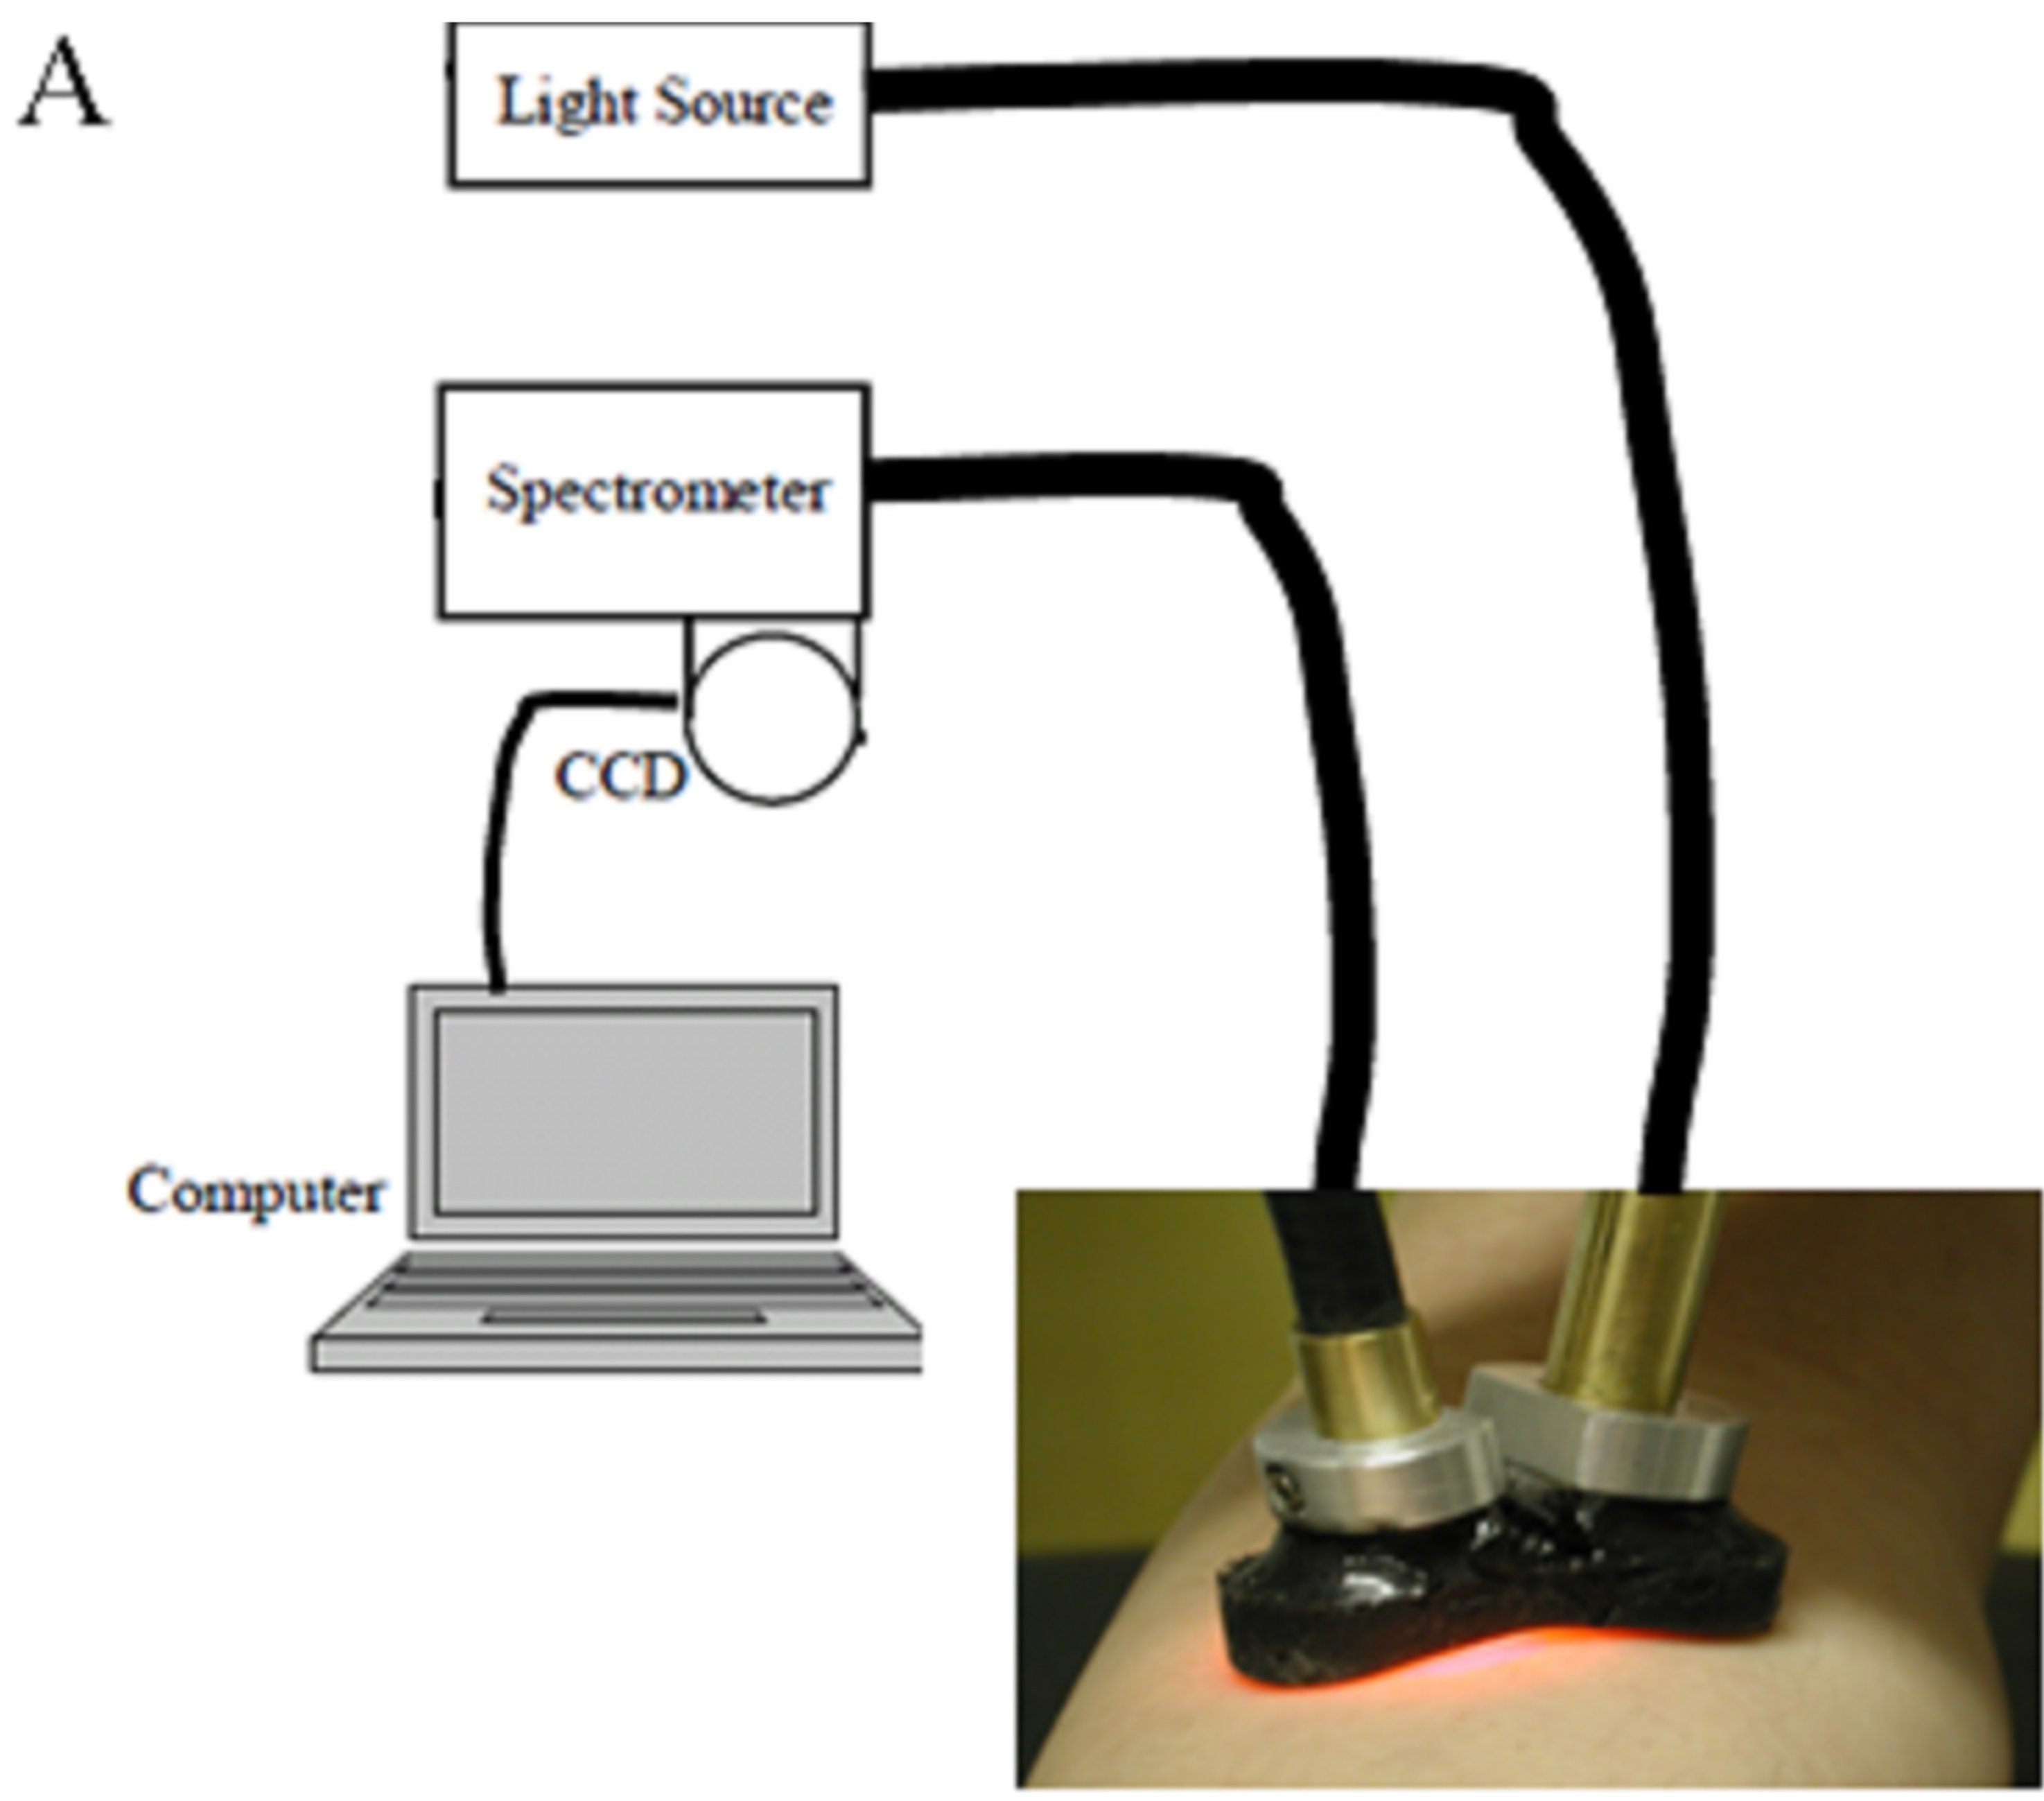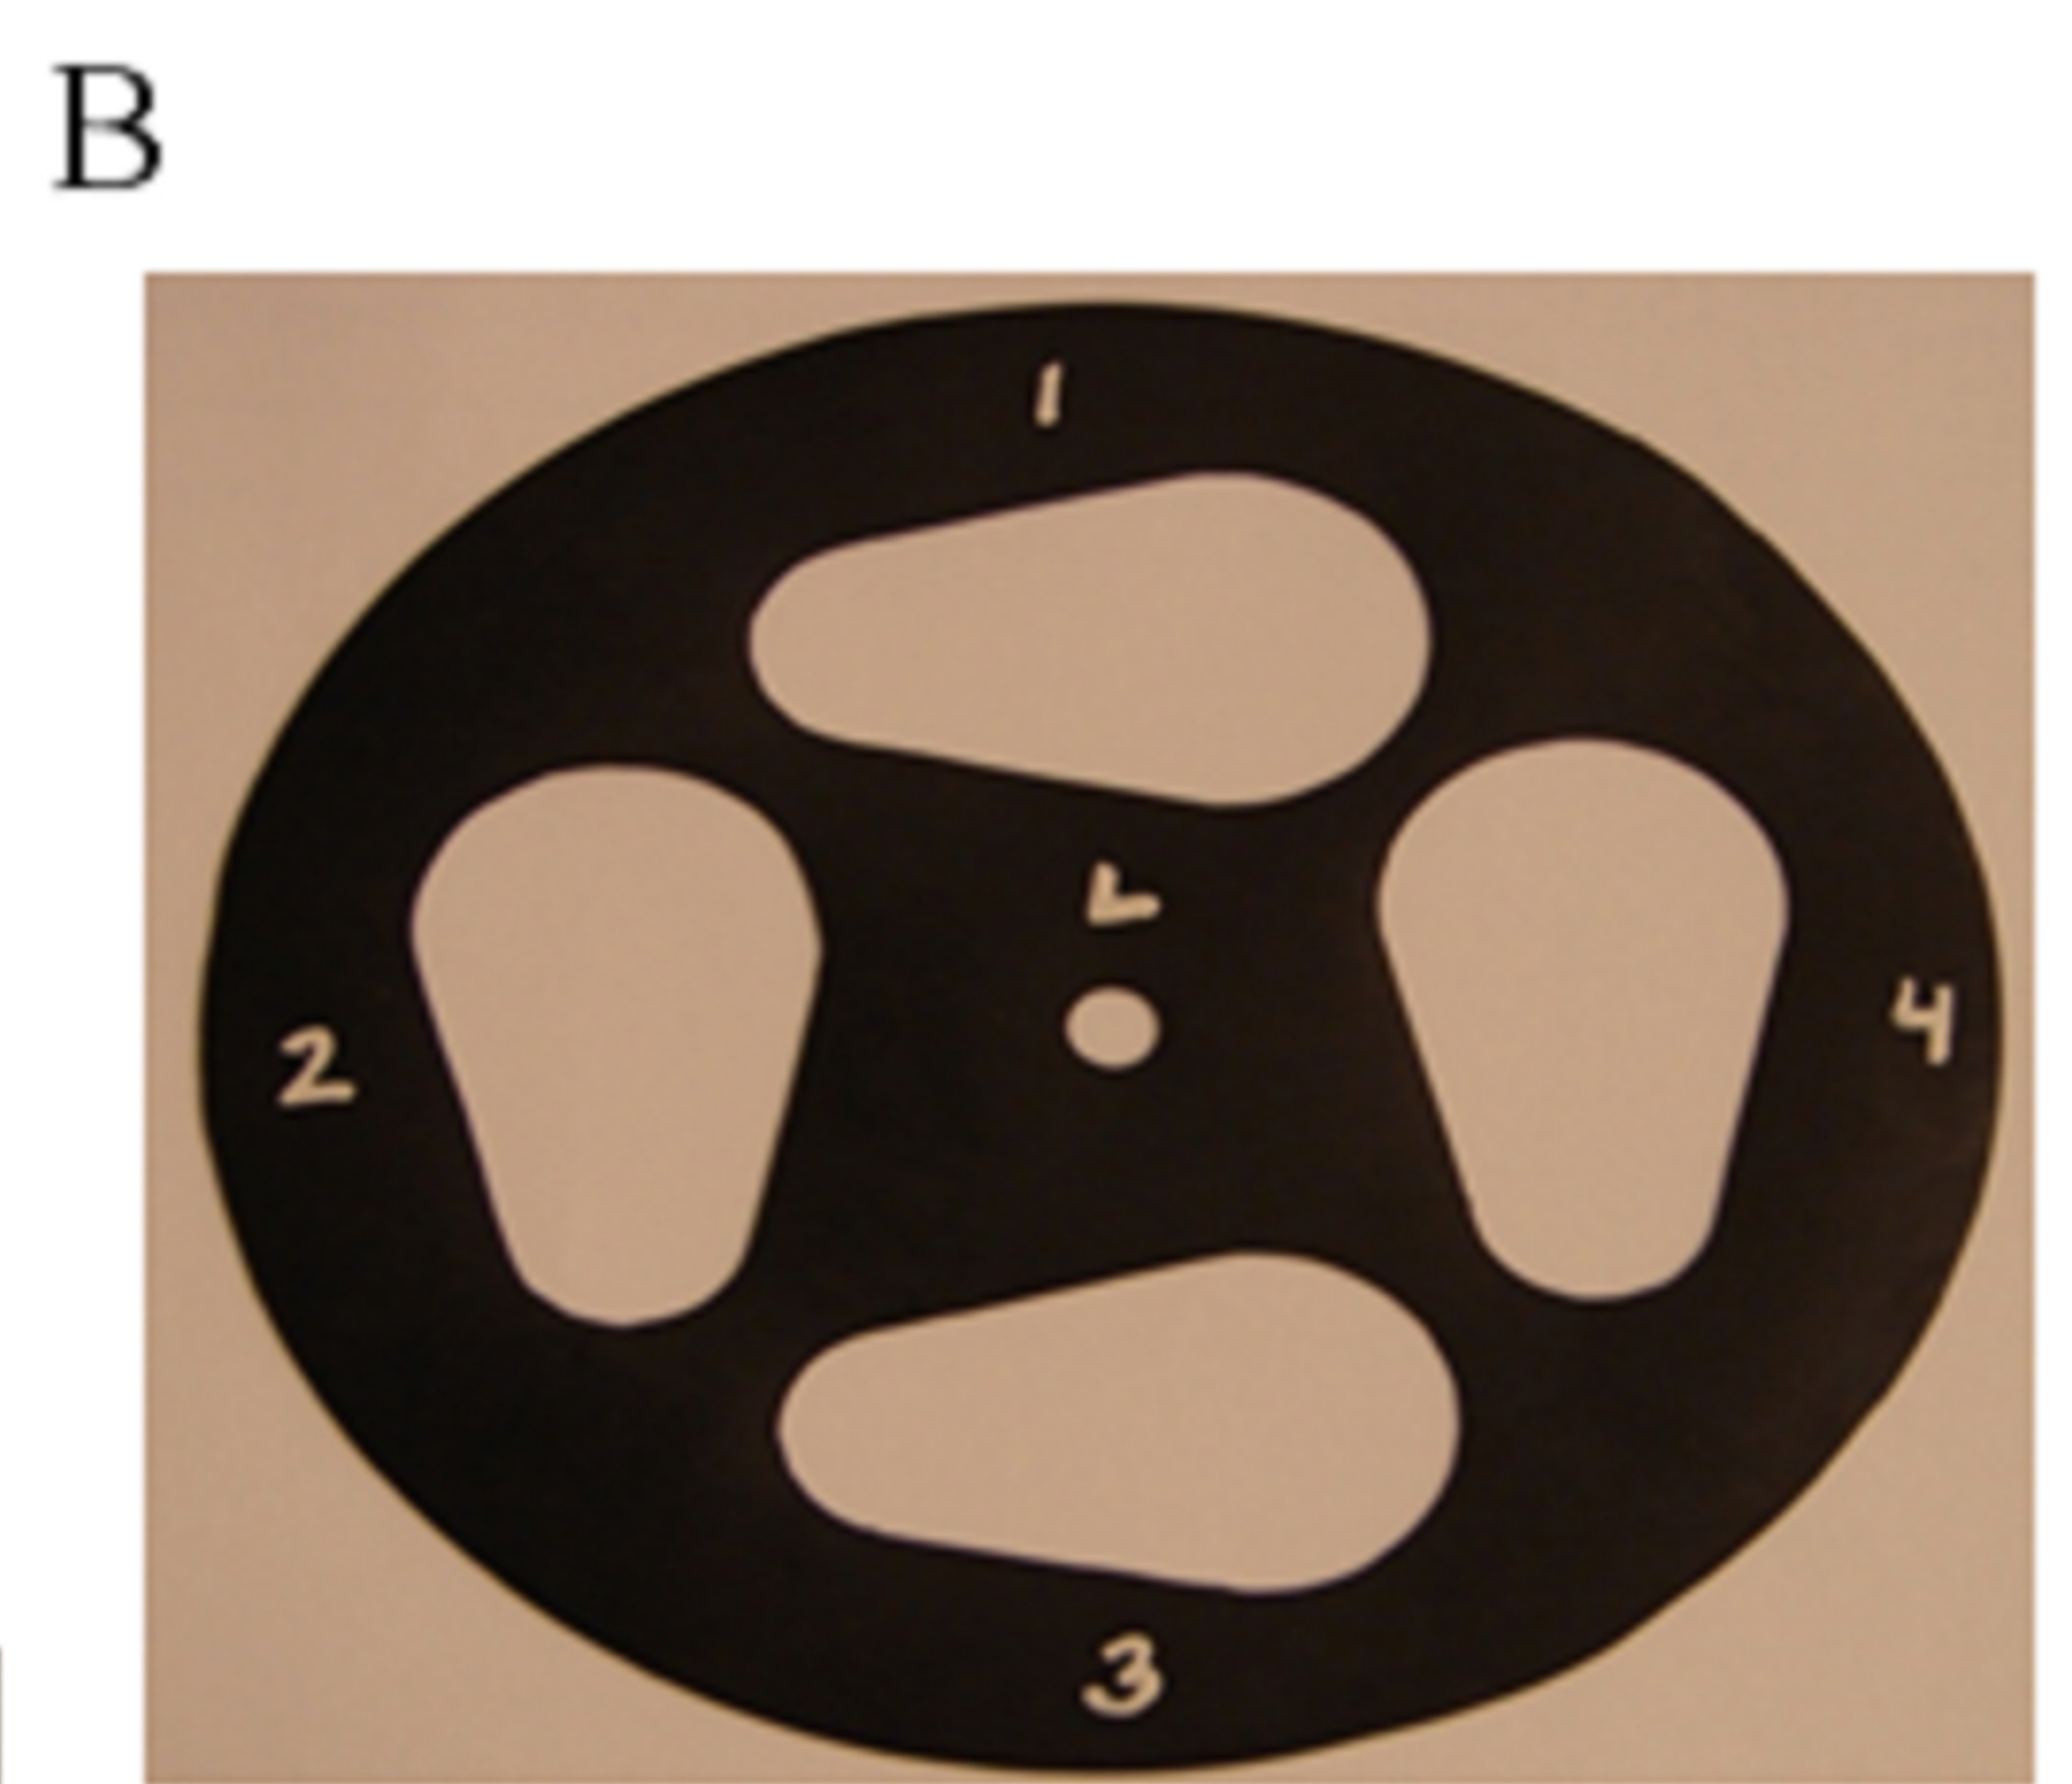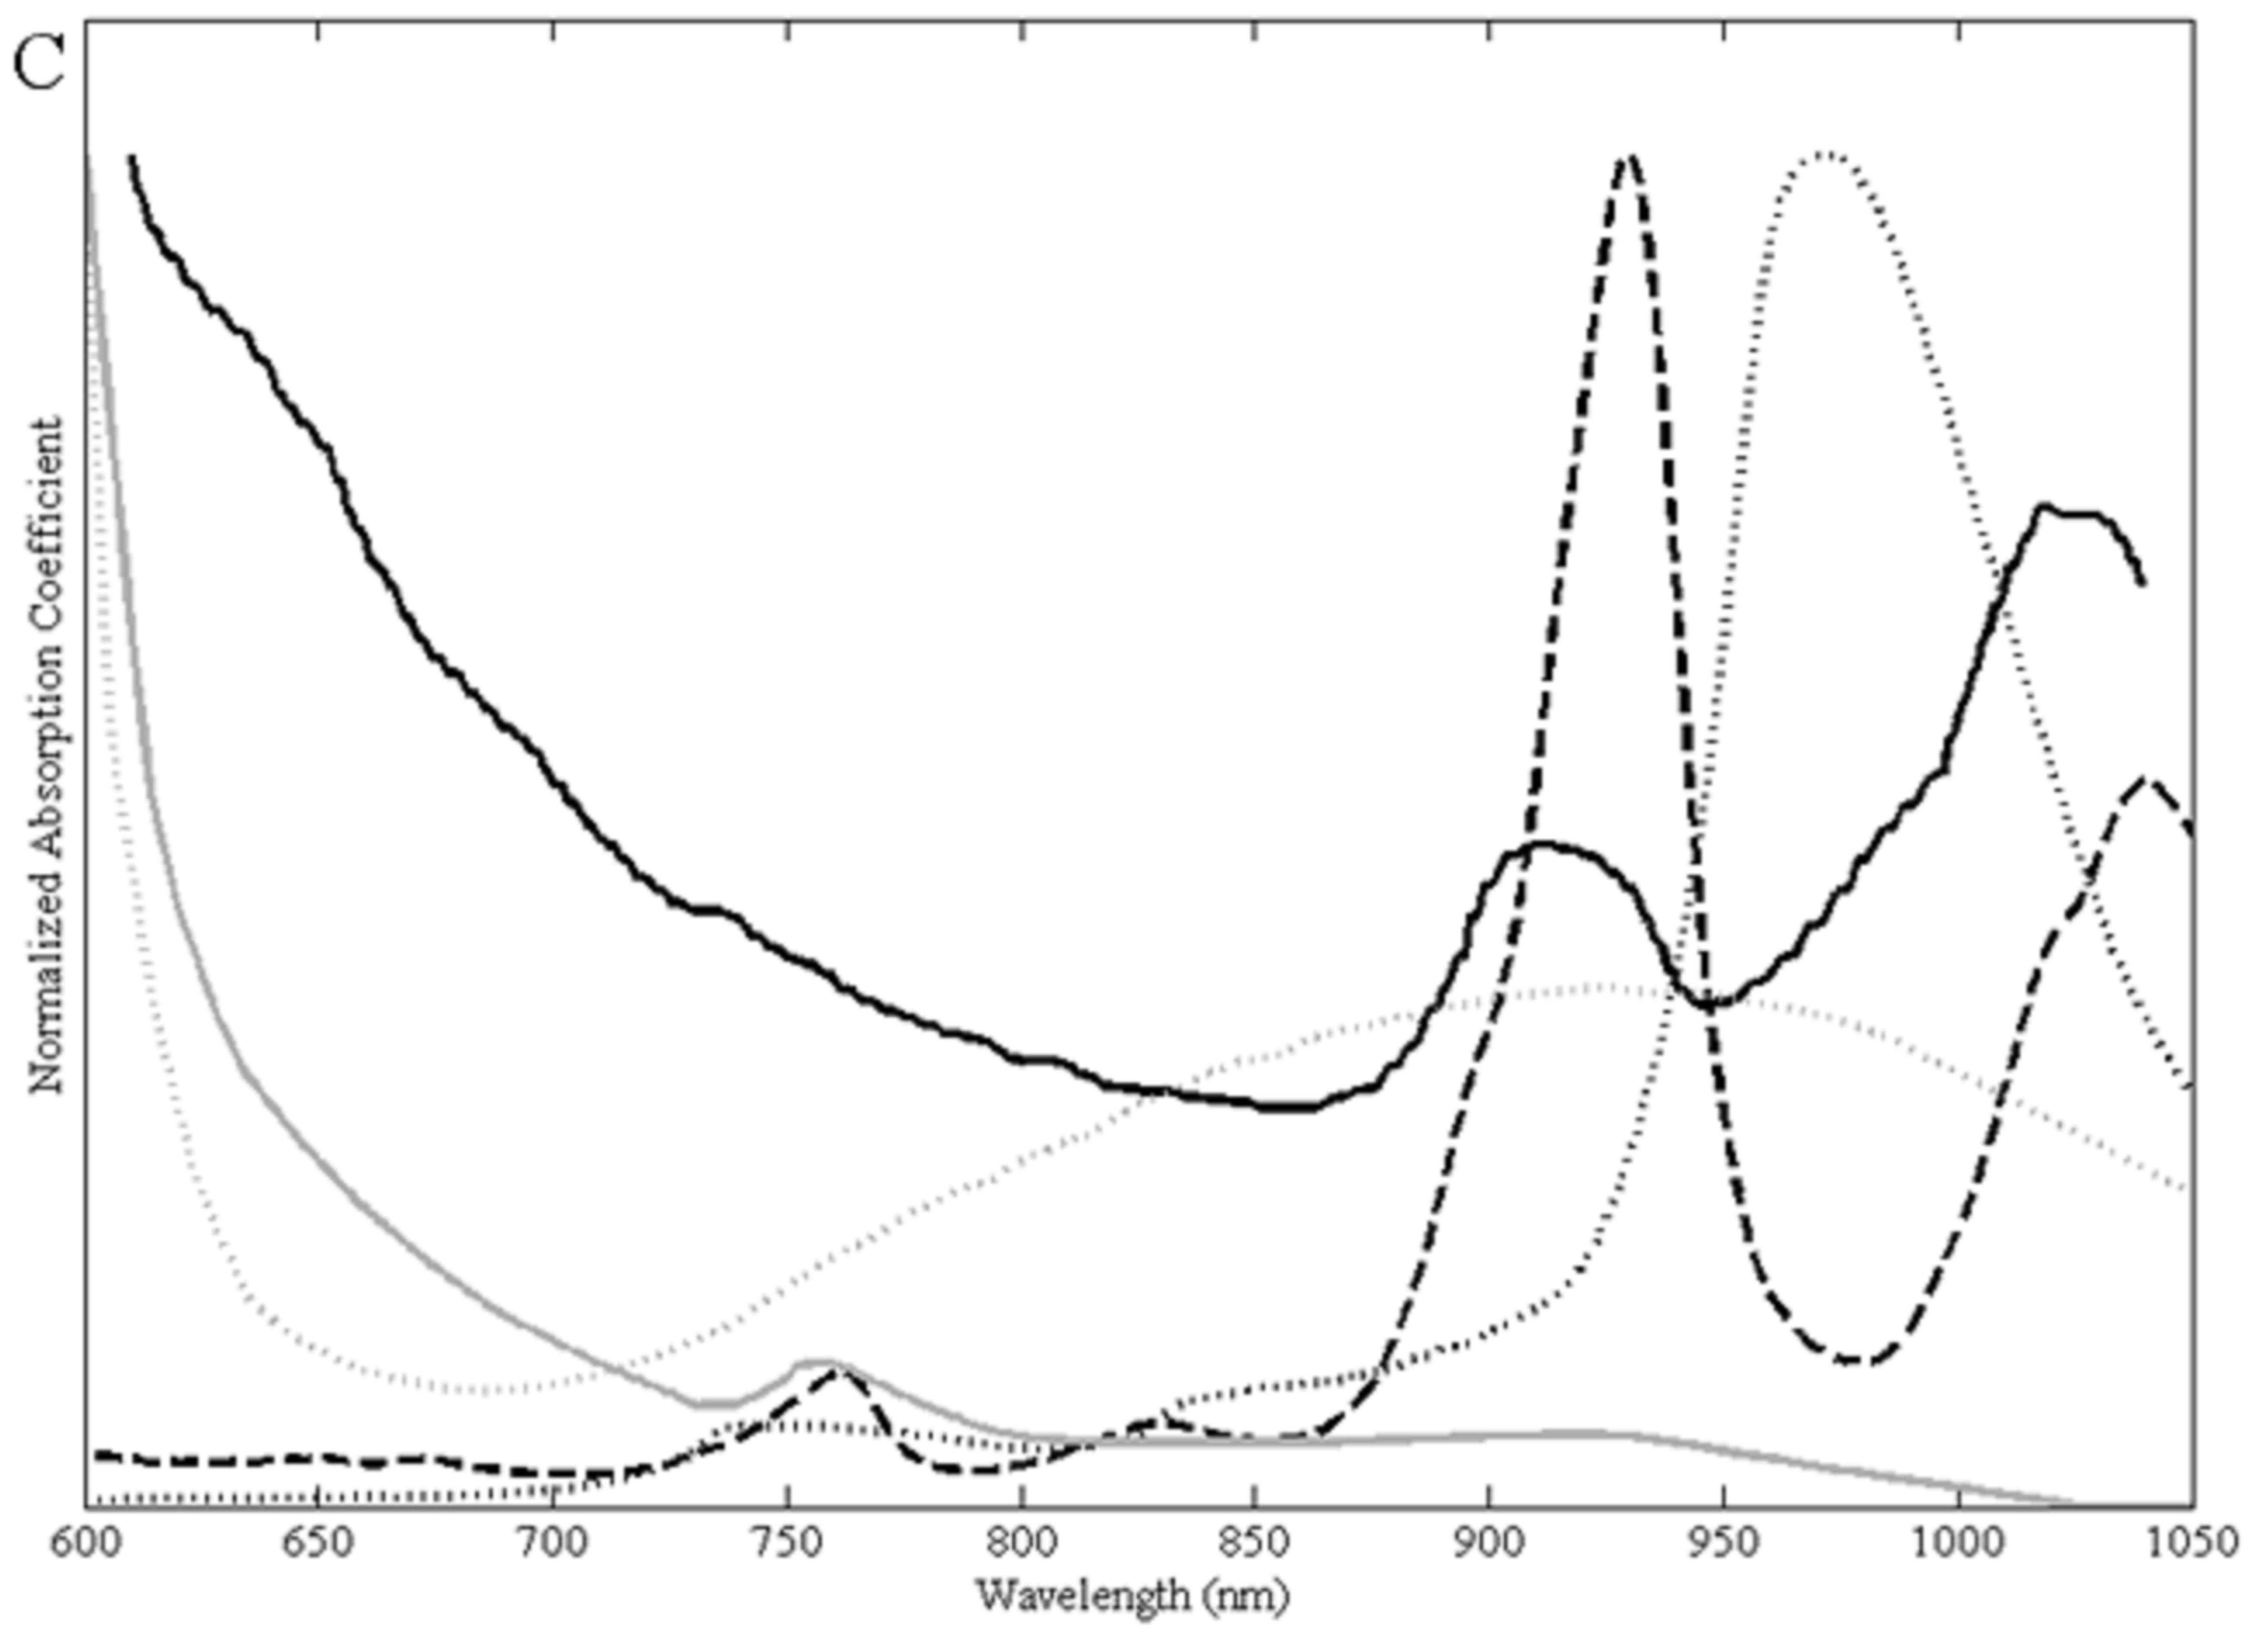

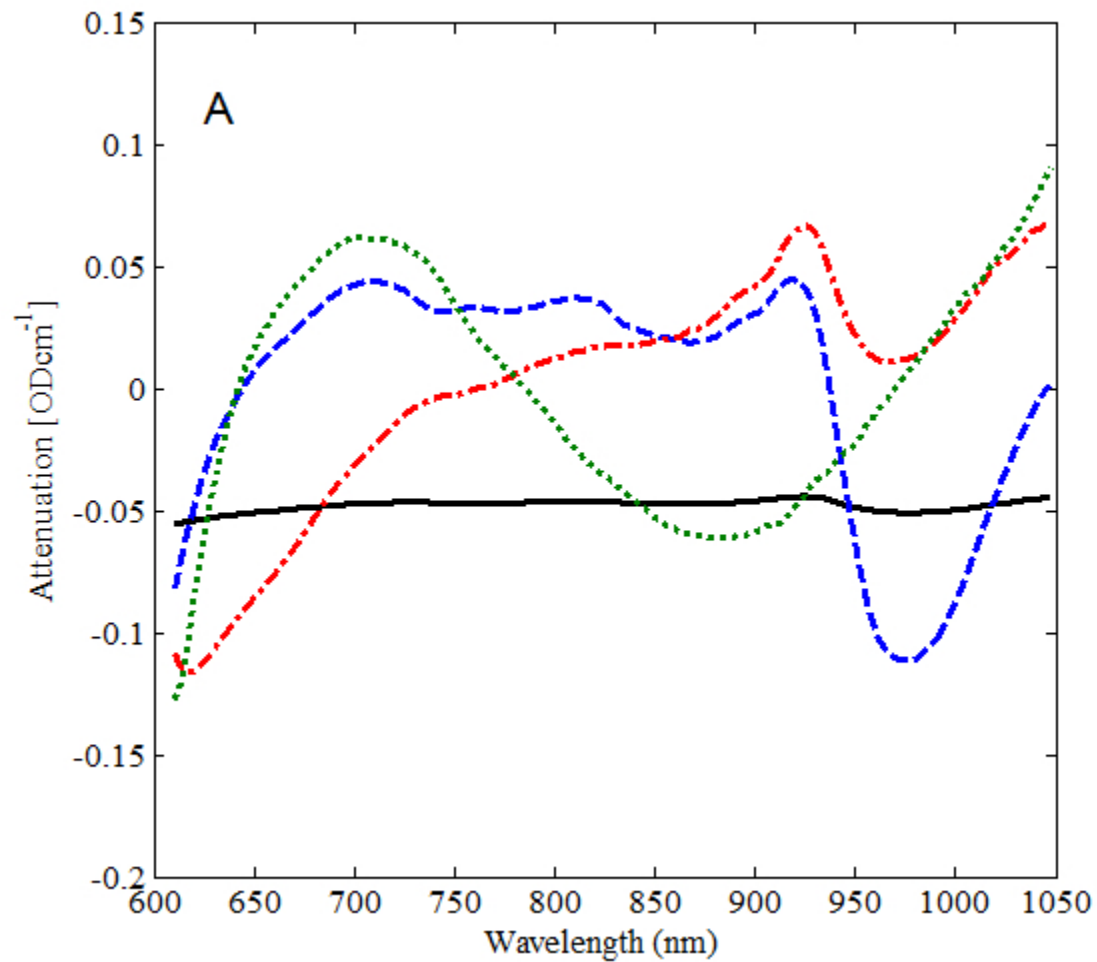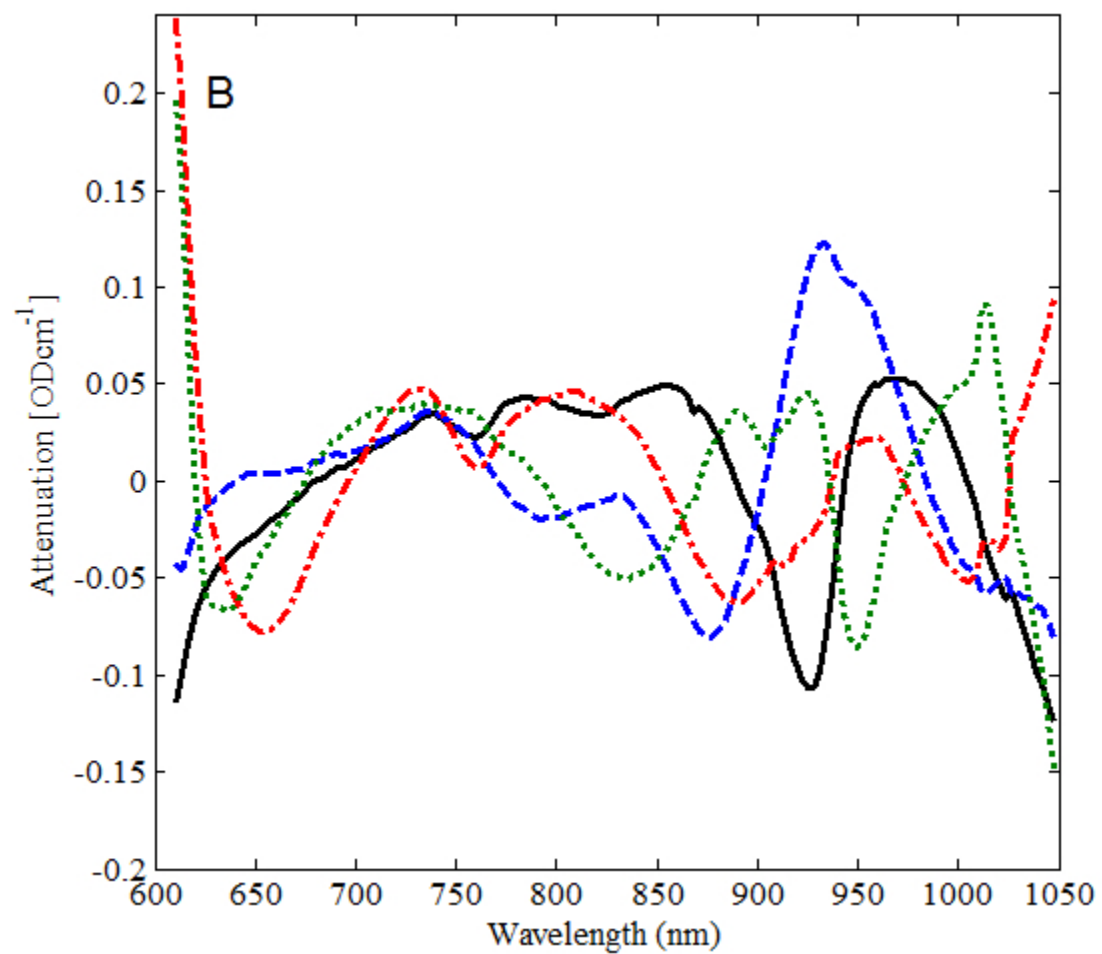

Figure S3A

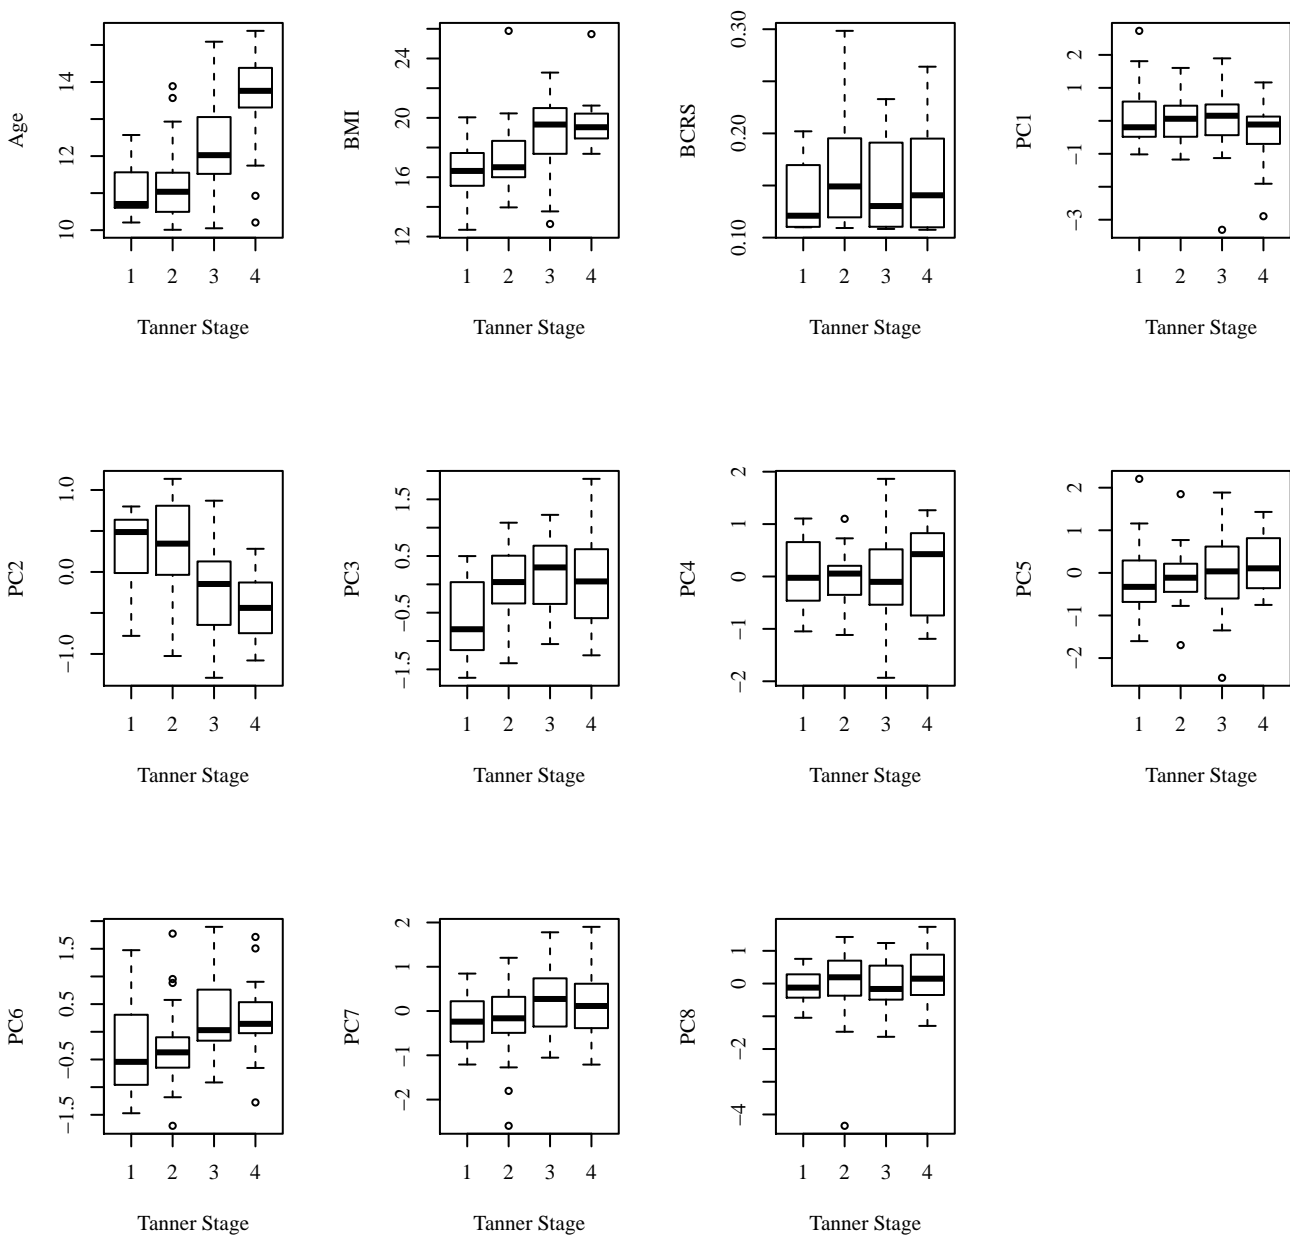

Figure S3B

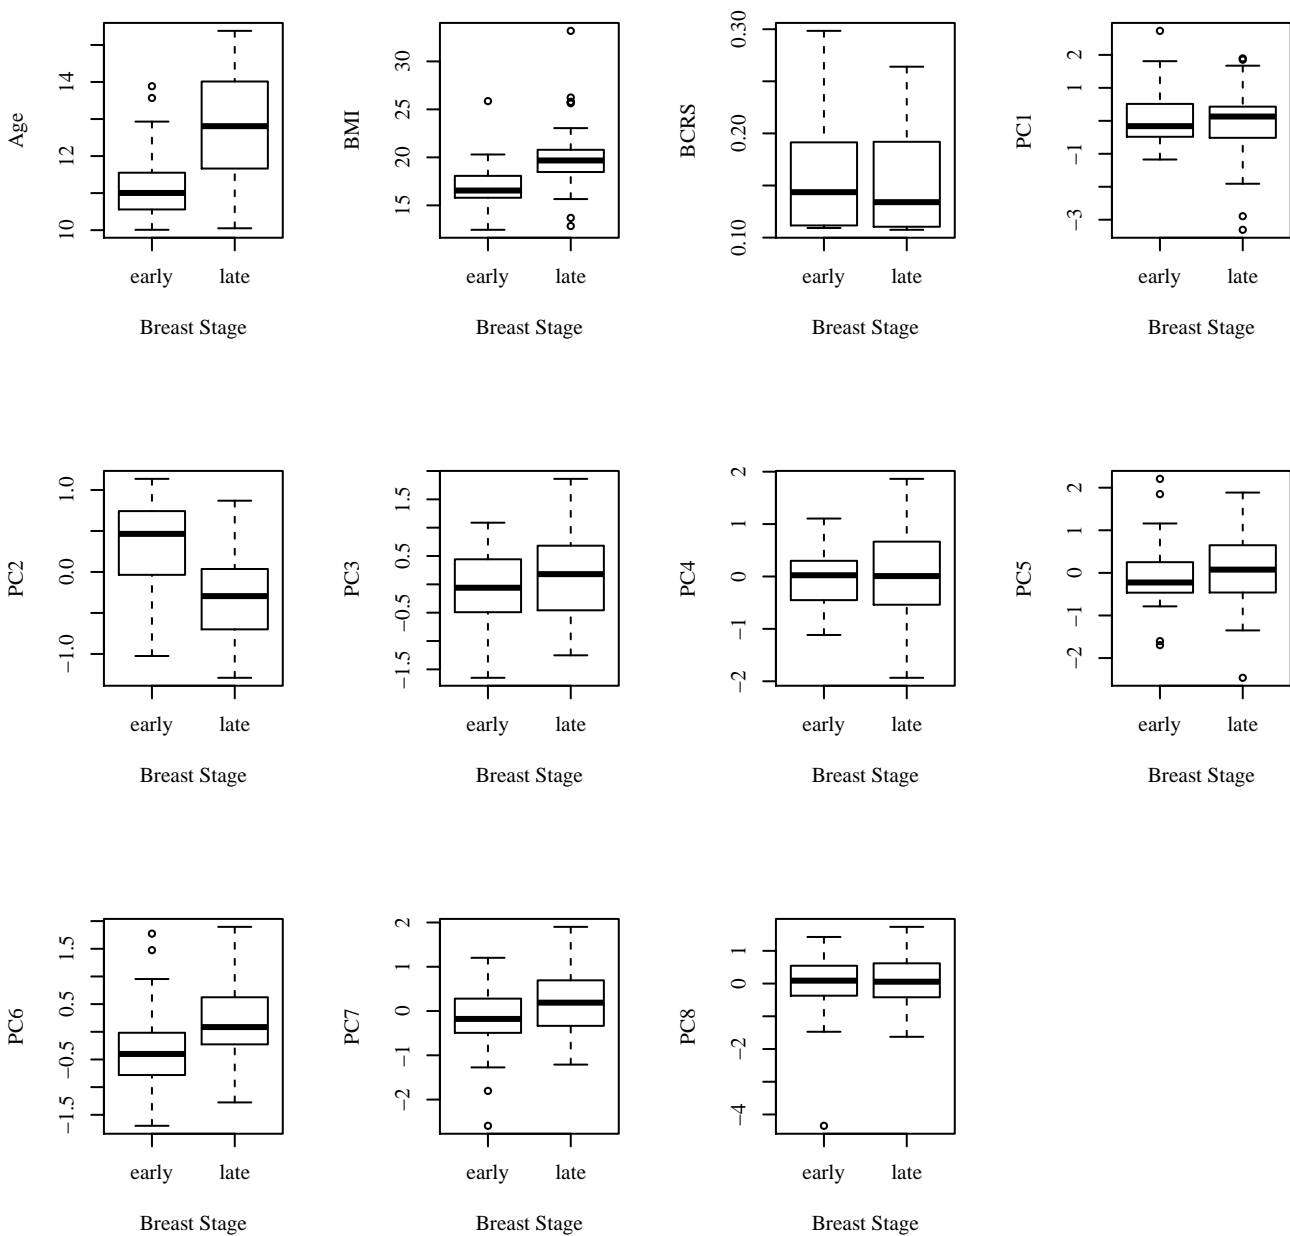

Figure S4A

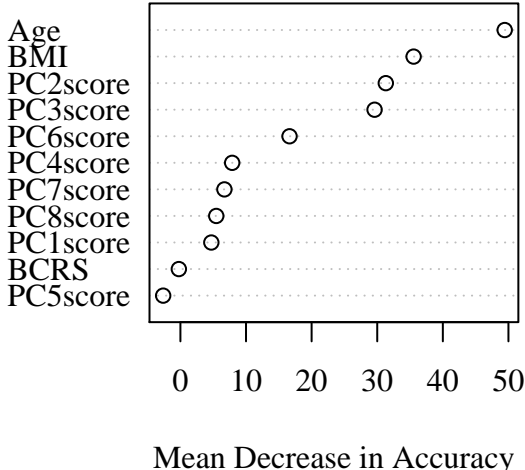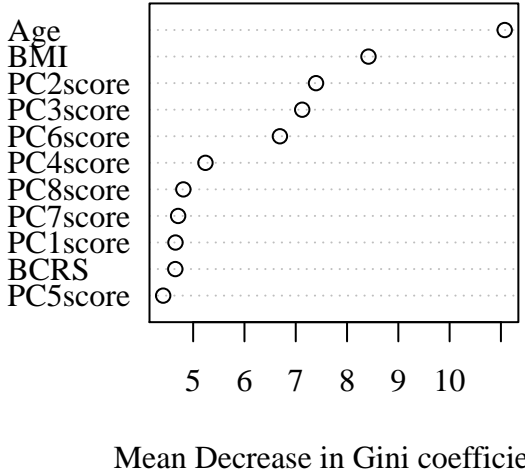

Figure S4B

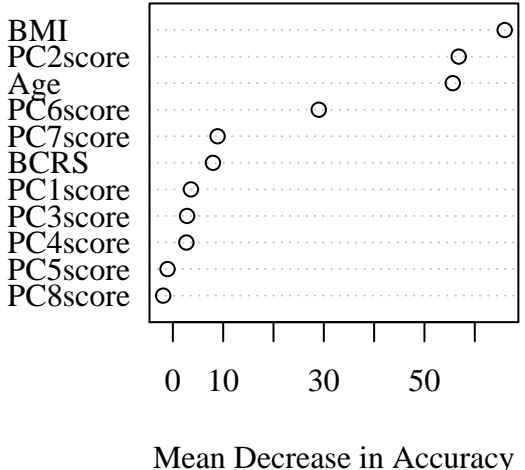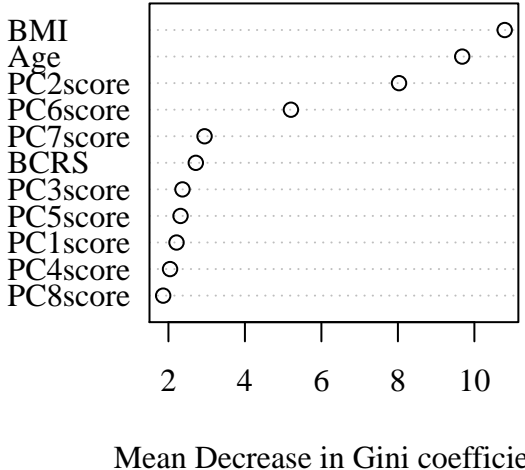

Figure S5

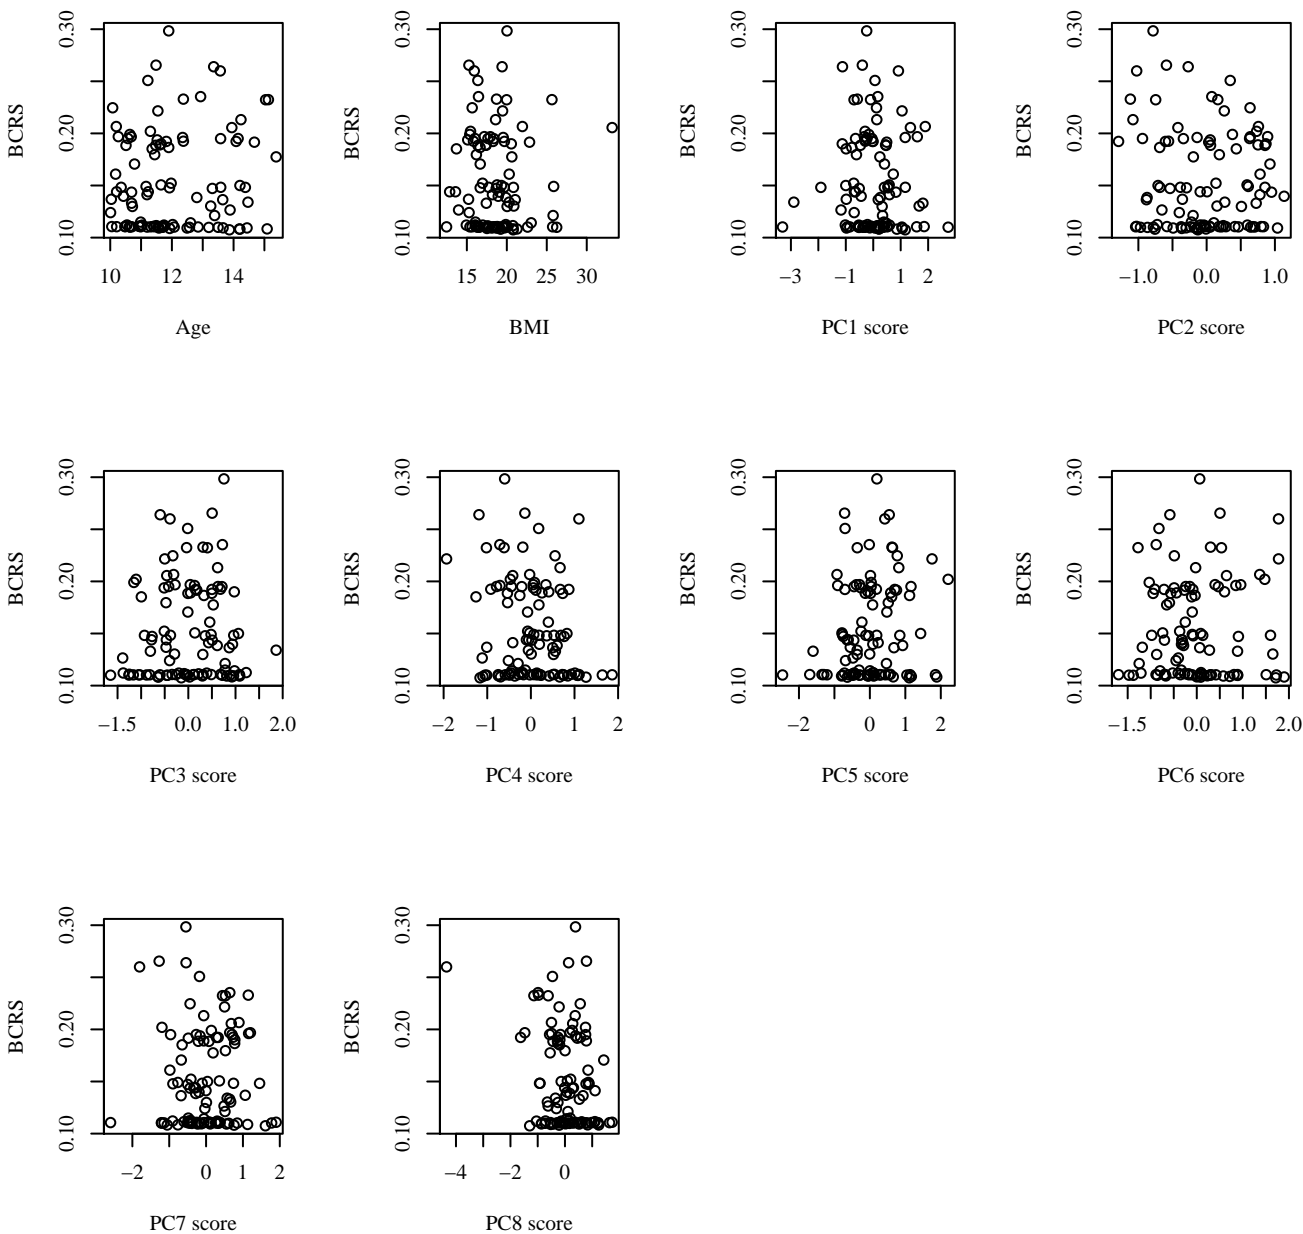

Supplement: MOESM1 [file 12046870]
