# Supplementary material for: Non-invasive optical spectroscopic monitoring of breast development during puberty
Source: Springer Nature journal article supplement (doi:10.1186/s13058-017-0805-x), 2017-02-06
Supplement: MOESM2 [file 12046870]

**Table S1A: Summary Statistics of predictor variables for the breast Tanner stage groups**

|              |             | <b>Age</b> |      | <b>BMI</b> |      | <b>Breast cancer risk*</b> |      |
|--------------|-------------|------------|------|------------|------|----------------------------|------|
| Breast_Stage | sample_size | Mean       | SD   | Mean       | SD   | Mean                       | SD   |
| 1            | 16          | 11.05      | 0.64 | 16.50      | 1.90 | 1.70                       | 0.45 |
| 2            | 31          | 11.19      | 0.95 | 17.31      | 2.25 | 2.04                       | 0.66 |
| 3            | 31          | 12.32      | 1.23 | 18.90      | 2.43 | 1.80                       | 0.51 |
| 4            | 18          | 13.58      | 1.38 | 19.70      | 1.74 | 1.88                       | 0.64 |

  

|              |             | <b>PC1*</b> |       | <b>PC2*</b> |      | <b>PC3*</b> |      |
|--------------|-------------|-------------|-------|-------------|------|-------------|------|
| Breast_Stage | sample_size | Mean        | SD    | Mean        | SD   | Mean        | SD   |
| 1            | 16          | 0.19        | 1.01  | 0.33        | 0.43 | -0.62       | 0.69 |
| 2            | 31          | 0.001       | 0.649 | 0.31        | 0.60 | 0.11        | 0.59 |
| 3            | 31          | 0.10        | 1.02  | -0.23       | 0.57 | 0.15        | 0.65 |
| 4            | 18          | -0.37       | 0.95  | -0.41       | 0.42 | 0.10        | 0.80 |

  

|              |             | <b>PC4*</b> |      | <b>PC5*</b> |      | <b>PC6*</b> |      |
|--------------|-------------|-------------|------|-------------|------|-------------|------|
| Breast_Stage | sample_size | Mean        | SD   | Mean        | SD   | Mean        | SD   |
| 1            | 16          | 0.04        | 0.68 | -0.07       | 0.92 | -0.34       | 0.88 |
| 2            | 31          | -0.04       | 0.48 | -0.08       | 0.62 | -0.27       | 0.69 |
| 3            | 31          | -0.03       | 0.82 | 0.01        | 0.92 | 0.28        | 0.82 |
| 4            | 18          | 0.14        | 0.86 | 0.22        | 0.66 | 0.24        | 0.72 |

  

|              |             | <b>PC7*</b> |      | <b>PC8*</b> |      |
|--------------|-------------|-------------|------|-------------|------|
| Breast_Stage | sample_size | Mean        | SD   | Mean        | SD   |
| 1            | 16          | -0.23       | 0.64 | -0.12       | 0.51 |
| 2            | 31          | -0.20       | 0.78 | 0.05        | 1.06 |
| 3            | 31          | 0.20        | 0.70 | -0.01       | 0.67 |
| 4            | 18          | 0.24        | 0.85 | 0.25        | 0.88 |

\*scaled by IQR (Inter-quartile range)

**Table S1B: Summary Statistics of predictor variables for the early and late breast stage groups**

|              |             | <b>Age</b>  |      | <b>BMI</b>  |      | <b>Breast cancer risk*</b> |      |
|--------------|-------------|-------------|------|-------------|------|----------------------------|------|
| Breast_Stage | sample_size | Mean        | SD   | Mean        | SD   | Mean                       | SD   |
| early        | 47          | 11.14       | 0.85 | 17.04       | 2.15 | 1.92                       | 0.61 |
| late         | 55          | 12.79       | 1.41 | 19.90       | 3.20 | 1.83                       | 0.55 |
|              |             | <b>PC1*</b> |      | <b>PC2*</b> |      | <b>PC3*</b>                |      |
| Breast_Stage | sample_size | Mean        | SD   | Mean        | SD   | Mean                       | SD   |
| early        | 47          | 0.07        | 0.78 | 0.31        | 0.54 | -0.14                      | 0.71 |
| late         | 55          | 0.02        | 1.00 | -0.30       | 0.50 | 0.14                       | 0.69 |
|              |             | <b>PC4*</b> |      | <b>PC5*</b> |      | <b>PC6*</b>                |      |
| Breast_Stage | sample_size | Mean        | SD   | Mean        | SD   | Mean                       | SD   |
| early        | 47          | -0.01       | 0.55 | -0.08       | 0.73 | -0.29                      | 0.75 |
| late         | 55          | 0.04        | 0.79 | 0.09        | 0.82 | 0.21                       | 0.78 |
|              |             | <b>PC7*</b> |      | <b>PC8*</b> |      |                            |      |
| Breast_Stage | sample_size | Mean        | SD   | Mean        | SD   |                            |      |
| early        | 47          | -0.21       | 0.73 | -0.01       | 0.91 |                            |      |
| late         | 55          | 0.20        | 0.72 | 0.09        | 0.73 |                            |      |

\*scaled by IQR (Inter-quartile range)

**Table S2 A: Correlation Analysis (n=102)**

| <b>Predictor</b> | <b>Breast Cancer Risk</b> |         |
|------------------|---------------------------|---------|
|                  | correlation coefficient*  | P-value |
| Age              | 0.13                      | 0.2001  |
| BMI              | -0.03                     | 0.7677  |
| PC1              | -0.04                     | 0.7256  |
| PC2              | -0.07                     | 0.4779  |
| PC3              | 0.06                      | 0.5611  |
| PC4              | -0.21                     | 0.0328  |
| PC5              | 0.17                      | 0.0907  |
| PC6              | 0.04                      | 0.7141  |
| PC7              | -0.01                     | 0.8963  |
| PC8              | -0.26                     | 0.0082  |

\* Spearman's

**Table S2 B: Correlation Analysis in the late subgroup (n=55)**

| <b>Predictor</b> | <b>Breast Cancer Risk</b> |         |
|------------------|---------------------------|---------|
|                  | correlation coefficient*  | P-value |
| Age              | 0.23                      | 0.0849  |
| BMI              | 0.04                      | 0.7802  |
| PC1              | -0.08                     | 0.5450  |
| PC2              | -0.06                     | 0.6447  |
| PC3              | -0.005                    | 0.9708  |
| PC4              | -0.36                     | 0.0074  |
| PC5              | 0.19                      | 0.1697  |
| PC6              | -0.09                     | 0.5014  |
| PC7              | 0.12                      | 0.4013  |
| PC8              | -0.34                     | 0.0114  |

\* Spearman's

Supplementary Table S3A) Correlation R between the PC spectra and chromophore spectra

| R   | Hb    | HbO <sub>2</sub> | Lipid | Water | Collagen |
|-----|-------|------------------|-------|-------|----------|
| PC1 | -0.71 | 0.07             | 0.46  | -0.22 | -0.49    |
| PC2 | -0.01 | -0.42            | -0.06 | -0.87 | -0.15    |
| PC3 | -0.90 | 0.58             | 0.63  | 0.41  | -0.58    |
| PC4 | -0.24 | -0.69            | -0.08 | 0.14  | 0.44     |
| PC5 | -0.32 | -0.08            | -0.67 | 0.09  | -0.64    |
| PC6 | -0.01 | 0.00             | 0.34  | 0.15  | -0.05    |
| PC7 | 0.13  | 0.04             | -0.12 | -0.09 | -0.28    |
| PC8 | 0.09  | 0.02             | 0.00  | 0.00  | -0.20    |

Supplementary Table S3B) significance of PC spectra to chromophore spectra correlation as given by the p value

| P   | Hb     | HbO <sub>2</sub> | Lipid  | Water  | Collagen |
|-----|--------|------------------|--------|--------|----------|
| PC1 | <0.001 | 0.168            | <0.001 | <0.001 | <0.001   |
| PC2 | 0.847  | <0.001           | 0.237  | <0.001 | 0.002    |
| PC3 | <0.001 | <0.001           | <0.001 | <0.001 | <0.001   |
| PC4 | <0.001 | <0.001           | 0.084  | 0.004  | <0.001   |
| PC5 | <0.001 | <0.001           | <0.001 | 0.059  | <0.001   |
| PC6 | 0.813  | <0.001           | <0.001 | 0.002  | 0.293    |
| PC7 | 0.005  | 0.422            | 0.011  | 0.048  | <0.001   |
| PC8 | 0.059  | 0.707            | 0.919  | 0.945  | <0.001   |
